# Supplementary material for: Novel high-temperature phase and crystal structure evolution of CsCuBr3 halide identified by neutron powder diffraction
Source: Royal Society of Chemistry journal article supplement (doi:10.1039/d3ce00432e), 2023-01-01
Supplement: d3ce00432e1.pdf [file d3ce00432e1.pdf]

## Supporting Information

# Novel high-temperature phase and crystal structure evolution of CsCuBr<sub>3</sub> halide identified by neutron powder diffraction

*Carmen Abia,<sup>a,c</sup> Carlos A. López<sup>a,b</sup>, Javier Gainza<sup>a</sup>, Joao E. F. Rodrigues<sup>d</sup>, María T. Fernández-Díaz<sup>c</sup>, Consuelo Álvarez-Galván<sup>e</sup> and José A. Alonso<sup>a</sup>*

*<sup>a</sup>Instituto de Ciencia de Materiales de Madrid, CSIC, Cantoblanco 28049 Madrid, Spain.*

*<sup>b</sup>INTEQUI, (UNSL-CONICET) and Facultad de Química, Bioquímica y Farmacia, UNSL, Almirante Brown 1455, 5700, San Luis, Argentina.*

*<sup>c</sup>Institut Laue Langevin. 38000 Grenoble Cedex, France.*

*<sup>d</sup>European Synchrotron Radiation Facility, 38000 Grenoble Cedex, France.*

*<sup>e</sup>Instituto de Catálisis y Petroleoquímica, CSIC, Cantoblanco 28049 Madrid, Spain.*

[\\*ja.alonso@icmm.csic.es](mailto:ja.alonso@icmm.csic.es), [abia-sanze@ill.fr](mailto:abia-sanze@ill.fr), [calclopez@gmail.com](mailto:calclopez@gmail.com).

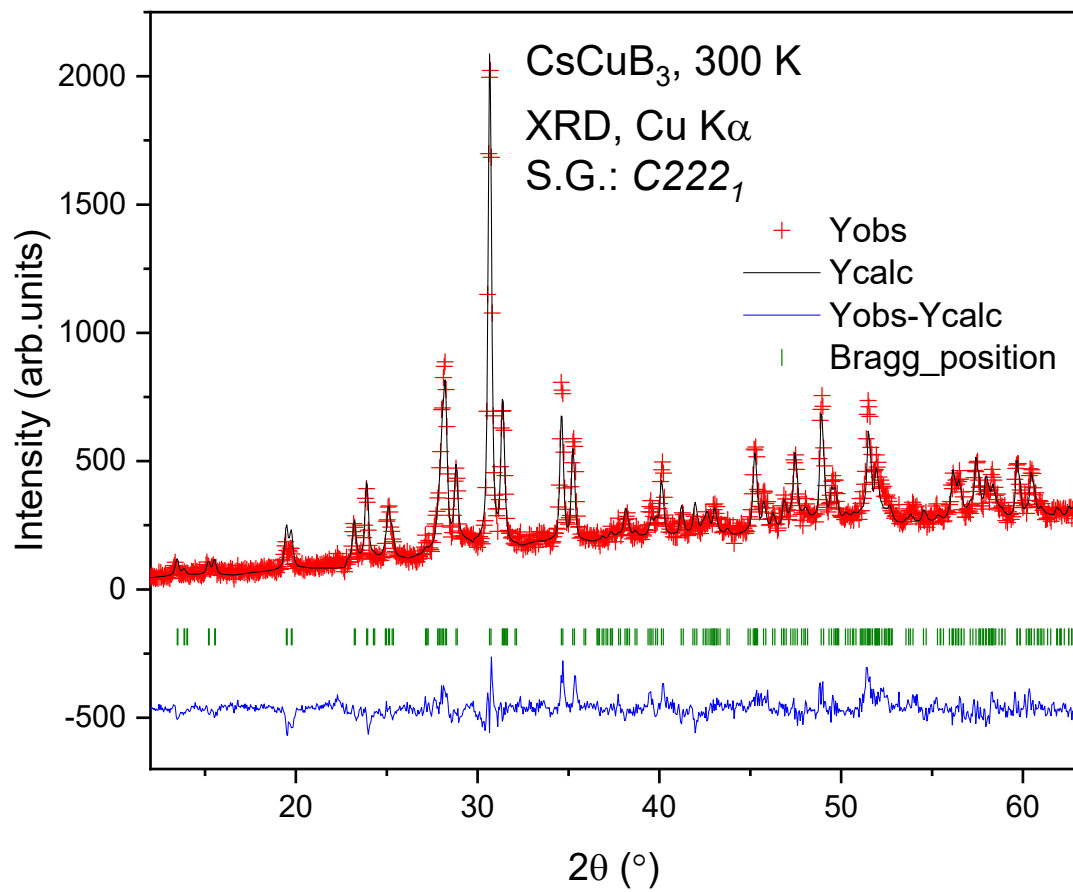

**Figure S1:** Observed (red crosses), calculated (full black line) and difference (blue line) Rietveld profiles for CsCuBr<sub>3</sub> at RT, from laboratory XRD.

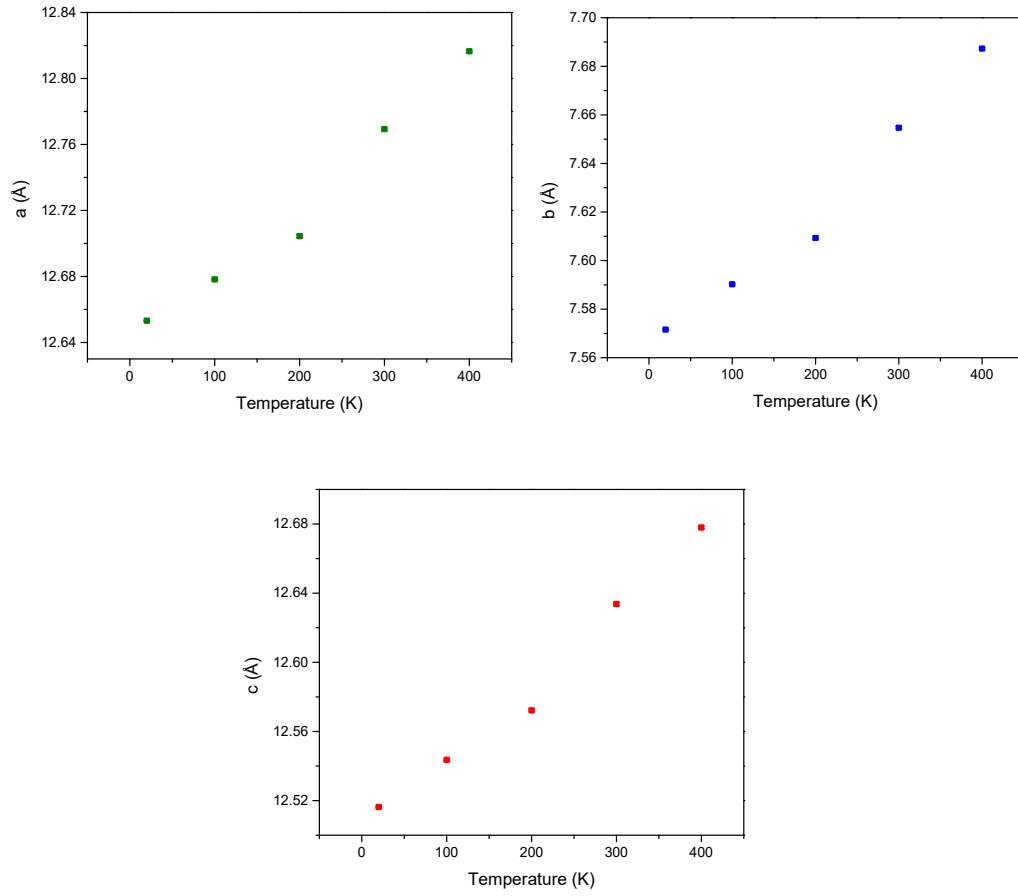

**Figure S2:** Plots of the evolution of the orthorhombic  $a$ ,  $b$  and  $c$  parameters of the  $\text{CsCuBr}_3$  crystal with temperature, data obtained from NPD.
